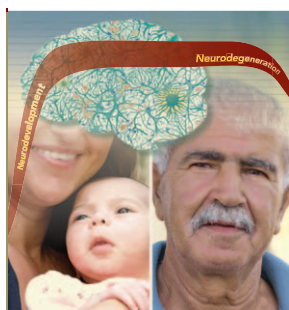

## ON THE COVER:

Emerging lines of evidence suggest that neuroinflammation in the brain with anesthesia and surgery is associated with cognitive effects during development and with postoperative cognitive dysfunction and might be targeted to prevent these events:

- Zuo: Postoperative Cognitive Effects in Newborns: The Role of Inflammatory Processes, p. 481
- Sanders and Avidan: Postoperative Cognitive Trajectories in Adults: The Role of Inflammatory Processes, p. 484
- Shen *et al.*: Selective Anesthesia-induced Neuroinflammation in Developing Mouse Brain and Cognitive Impairment, p. 502
- Zheng *et al.*: Sevoflurane Anesthesia in Pregnant Mice Induces Neurotoxicity in Fetal and Offspring Mice, p. 516
- Degos *et al.*: Depletion of Bone Marrow-derived Macrophages Perturbs the Innate Immune Response to Surgery and Reduces Postoperative Memory Dysfunction, p. 527

## THIS MONTH IN ANESTHESIOLOGY

9A

## EDITORIAL VIEWS

### Case Reports Are Leaving ANESTHESIOLOGY, but Not the Specialty

*James C. Eisenach*

479

### Postoperative Cognitive Effects in Newborns: The Role of Inflammatory Processes

*Zhiyi Zuo*

481

### Postoperative Cognitive Trajectories in Adults: The Role of Inflammatory Processes

*Robert D. Sanders and Michael S. Avidan*

484

### Dual Effects of Isoflurane on Neuronal Proliferation/Differentiation: A Substrate to Impaired Cognitive Function?

*Lionel Velly, Jean Mantz, and Nicolas Bruder*

487

### Back To Blockers? The Continued Search for the Ideal Endobronchial Blocker

*Edmond Cohen*

490

### Delirium, Neurotransmission, and Network Connectivity: The Search for a Comprehensive Pathogenic Framework

*Robert D. Sanders*

494

### Continuous Measurement of Hemoglobin: Methodological Approach and Lessons for the Future

*Bruno Riou*

497

### Cuffed *versus* Uncuffed Endotracheal Tubes in Pediatric Anesthesia: The Debate Should Finally End

*Ronald S. Litman and Lynne G. Maxwell*

500

◇ Refers to This Month in Anesthesiology

◆ Refers to Editorial Views

See Supplemental Digital Content

CME CME Article

## ■ PERIOPERATIVE MEDICINE

- ◆ **Selective Anesthesia-induced Neuroinflammation in Developing Mouse Brain and Cognitive Impairment**

*Xia Shen, Yuanlin Dong, Zhipeng Xu, Hui Wang, Changhong Miao, Sulpicio G. Soriano, Dandan Sun, Mark G. Baxter, Yiyang Zhang, and Zhongcong Xie*

Anesthesia with sevoflurane, but not desflurane, for 2 h daily for 3 days, but not 1 day, induced cognitive impairment and neuroinflammation in young but not adult mice. An enriched environment and anti-inflammatory treatment ameliorated the sevoflurane-induced cognitive impairment.

502
- ◆ **Sevoflurane Anesthesia in Pregnant Mice Induces Neurotoxicity in Fetal and Offspring Mice**

*Hui Zheng, Yuanlin Dong, Zhipeng Xu, Gregory Crosby, Deborah J. Culley, Yiyang Zhang, and Zhongcong Xie*

Sevoflurane anesthesia in pregnant mice induced increases in interleukin-6 levels, reductions in synaptic marker postsynaptic density-95 and synaptophysin levels, caspase-3 activation, and learning and memory impairment in fetal and offspring mice.

516
- ◆ **Depletion of Bone Marrow-derived Macrophages Perturbs the Innate Immune Response to Surgery and Reduces Postoperative Memory Dysfunction**

*Vincent Degos, Susana Vacas, Zhenying Han, Nico van Rooijen, Pierre Gressens, Hua Su, William L. Young, and Mervyn Maze*

Hippocampal recruitment of bone marrow-derived macrophages plays a causative role in postoperative cognitive decline. Interventions designed to prevent its activation and/or migration into the brain may represent a feasible preemptive strategy.

527
- ◆ **Dual Effects of Isoflurane on Proliferation, Differentiation, and Survival in Human Neuroprogenitor Cells**

*Xuli Zhao, Zeyong Yang, Ge Liang, Zhen Wu, Yi Peng, Donald J. Joseph, Saadet Inan, and Huafeng Wei*

Isoflurane provides dual effects on cell survival, proliferation, and differentiation through differential activation of InsP<sub>3</sub> and/or ryanodine receptor calcium channels located on the endoplasmic reticulum of human neuronal stem cells.

537
- ◆ **Efficiency, Efficacy, and Safety of EZ-Blocker Compared with Left-sided Double-lumen Tube for One-lung Ventilation**

*Jo Mourisse, Jordi Liesveld, Ad Verhagen, Garance van Rooij, Stefan van der Heide, Olga Schuurbijs-Siebers, and Erik Van der Heijden*

A new bronchial blocker, the EZ-Blocker, is an easy and efficient device to allow one-lung ventilation and causes less injury to tracheal and bronchial mucosa and less sore throat compared with a double-lumen tube.

550
- Bidirectional Regulation of Intravenous General Anesthetic Actions by  $\alpha 3$ -containing  $\gamma$ -aminobutyric Acid<sub>A</sub> Receptors**

*Carolyn J. Straub, Hew Mun Lau, Rosanna Parlato, Guenther Schuetz, Jean-Marc Fritschy, and Uwe Rudolph*

$\alpha 3$ -containing  $\gamma$ -aminobutyric acid<sub>A</sub> receptors mediate actions of some and indirectly constrain actions of other intravenous anesthetics; the latter function appears at least in part to be due to  $\alpha 3$ -containing  $\gamma$ -aminobutyric acid<sub>A</sub> receptors on noradrenergic neurons.

562
- Effects of Subanesthetic Dose of Nitrous Oxide on Cerebral Blood Flow and Metabolism: A Multimodal Magnetic Resonance Imaging Study in Healthy Volunteers**

*Naranjargal Dashdorj, Kathryn Corrie, Antonio Napolitano, Esben Petersen, Ravi P. Mahajan, and Dorothee P. Auer*

In healthy volunteers, a subanesthetic dose (30%) of nitrous oxide significantly dilated cerebral blood vessels without changes in cerebral metabolism. Further studies are required to explore the potential of sub-anesthetic nitrous oxide in cerebral vasospasm.

577

***Drosophila* Ryanodine Receptors Mediate General Anesthesia by Halothane**

587

*Shuying Gao, David J. Sandstrom, Harold E. Smith, Brigit High, Jon W. Marsh, and Howard A. Nash*

The potency of halothane anesthesia paralleled gene dosage of the ryanodine receptor  $\text{Ca}^{2+}$  release channel in *Drosophila* mutants. Halothane-evoked  $\text{Ca}^{2+}$  flux in central neurons was correlated with hyperpolarization.

**Propofol Anesthesia Impairs the Maturation and Survival of Adult-born Hippocampal Neurons**

602

*Marine Krzisch, Sébastien Sultan, Julie Sandell, Kornél Demeter, Laszlo Vutskits, and Nicolas Toni*

Exposure of adult mice to propofol interferes with the survival and maturation of neurons generated in the adult hippocampus at specific developmental stages.

**Effect of Sedation on Pain Perception**

611

*Michael A. Frölich, Kui Zhang, and Timothy J. Ness*

Eighty-six healthy volunteers were assigned to receive midazolam, propofol, or dexmedetomidine for sedation while undergoing several experimental pain tasks. Midazolam increased pain, whereas propofol and dexmedetomidine reduced ischemic and cold pain modalities only.

**◆ Epidural versus Continuous Preperitoneal Analgesia during Fast-track Open Colorectal Surgery: A Randomized Controlled Trial**

622

*Philippe Jouve, Jean-Etienne Bazin, Antoine Petit, Vincent Minville, Adeline Gerard, Emmanuel Buc, Aurelien Dupre, Fabrice Kwiatkowski, Jean-Michel Constantin, and Emmanuel Futier*

Continuous wound infiltration has been proposed as an alternative to epidural analgesia after colorectal surgery. We found that, compared with continuous wound infiltration, epidural analgesia improved functional recovery and pain control and reduced hospital stay.

**■ CRITICAL CARE MEDICINE****◆ ◆ Association between Endothelial Dysfunction and Acute Brain Dysfunction during Critical Illness**

631

*Christopher G. Hughes, Alessandro Morandi, Timothy D. Girard, Bernhard Riedel, Jennifer L. Thompson, Ayumi K. Shintani, Brenda T. Pun, E. Wesley Ely, and Pratik P. Pandharipande*

Endothelial function is impaired in critically ill patients. Because endothelial dysfunction contributes to altered cerebral blood flow and blood brain barrier permeability, it could lead to acute brain dysfunction during critical illness. One hundred forty-seven medical and surgical intensive care unit patients participated in this prospective cohort study. Endothelial function was assessed at enrollment using peripheral artery tonometry to determine reactive hyperemia index. After correcting for confounding variables, lower reactive hyperemia index, which reflected worse systemic endothelial function, was independently associated with fewer delirium/coma-free days. This suggests endothelial dysfunction may play a role in the pathogenesis of acute brain dysfunction during critical illness.

**◆ Accuracy of Determining Hemoglobin Level Using Occlusion Spectroscopy in Patients with Severe Gastrointestinal Bleeding**

640

*Julien Coquin, Amandine Bertarrex, Antoine Dewitte, Laurent Lefèvre, Olivier Joannes-Boyau, Catherine Fleureau, Stéphane Winnock, Sébastien Leuillet, Gérard Janvier, and Alexandre Ouattara*

In intensive care unit patients admitted for gastrointestinal hemorrhage, the determination of hemoglobin level by a noninvasive occlusion spectroscopy method lacks accuracy. Neither infusion of vasopressor agents nor site of measurement seems to influence these findings.

## Effect of Hyperoxia on Resuscitation of Experimental Combined Traumatic Brain Injury and Hemorrhagic Shock in Mice

649

Brian Blasiole, Hülya Bayır, Vincent A. Vagni, Keri Janesko-Feldman, Amin Cheikh, Stephen R. Wisniewski, Joseph B. Long, James Atkins, Valerian Kagan, and Patrick M. Kochanek

In an experimental model of traumatic brain injury combined with hemorrhagic shock, resuscitation with supplemental oxygen reduced resuscitation fluid requirements and attenuated neuronal death despite modest increases in oxidative stress and proinflammatory aspects of neuroinflammation.

### PAIN MEDICINE

#### Role of Meningeal Mast Cells in Intrathecal Morphine-evoked Granuloma Formation

664

Tony L. Yaksh, Jeffery W. Allen, Samantha L. Veasart, Kjersti A. Horais, Shelle A. Malkmus, Miriam Scadeng, Joanne J. Steinauer, and Steve S. Rossi

Intrathecal morphine infusion leads to a meningeally derived granuloma. The present work in the dog points to a close correlation between the origin of these intrathecal granulomas and the degranulation of meningeal mast cells.

#### Critical Role of Protease-activated Receptor 2 Activation by Mast Cell Trypsin in the Development of Postoperative Pain

679

Sara M. Oliveira, Cássia R. Silva, and Juliano Ferreira

Some surgeries cause mast cell degranulation. In a mice model, trypsin or protease-activated receptor 2 inhibition reduced postoperative nociception in a manner consistent with mast cell degranulation and trypsin release.

#### $\sigma_1$ Receptors Are Involved in the Visceral Pain Induced by Intracolonic Administration of Capsaicin in Mice

691

Rafael González-Cano, Manuel Merlos, José M. Baeyens, and Cruz M. Cendán

Pharmacologic blockade or genetic inactivation of  $\sigma_1$  receptors inhibits pain-related behaviors and mechanical referred hyperalgesia in a pure visceral pain model in mice.

### EDUCATION

#### CASE SCENARIO

##### Pain-associated Respiratory Failure in Chest Trauma

701

Young Ahn, Klaus Görlinger, Hasan B. Alam, and Matthias Eikermann

#### IMAGES IN ANESTHESIOLOGY

##### Pharyngeal Wall Injury during Videolaryngoscopy-assisted Intubation

709

Christian Nestler, Alexander P. Reske, Andreas W. Reske, Hanno Pethke, and Thea Koch

##### Beware the Horns of the Mandible!

710

Arup De

##### Excessive Occipital-C1 Flexion via Halo Vest Immobilization: Oropharyngeal Space Reduction Leading to Difficult Airway Establishment

711

Kenneth N. Hiller

#### ANESTHESIA LITERATURE REVIEW

712

#### ORIGINAL INVESTIGATIONS IN EDUCATION

##### Efficacy of an Online Education Program for Ultrasound Diagnosis of Pneumothorax

715

Sundar Krishnan, Taftan Kuhl, Waseemuddin Ahmed, Kei Togashi, and Kenichi Ueda

Ultrasound has been shown to be a reliable tool for ruling out pneumothorax. After viewing a 5-min online training video, physicians were able to reliably rule out pneumothorax on an optimal ultrasound image.

## CLINICAL CONCEPTS AND COMMENTARY

### **Perioperative Therapeutic Plasmapheresis** 722

*Sloan C. Youngblood, Yi Deng, Alice Chen, and Charles D. Collard*

Perioperative indications for therapeutic plasmapheresis have expanded significantly. The physiologic effects of plasmapheresis are reviewed, including a discussion of potential complications. Specific perioperative considerations, including calcium hemostasis, coagulopathy, and pharmacokinetic effects, are emphasized.

## REVIEW ARTICLE

### **Situation Awareness in Anesthesia: Concept and Research** 729

*Christian M. Schulz, Mica R. Endsley, Eberhard F. Kochs, Adrian W. Gelb, and Klaus J. Wagner*

This review presents the concept of situation awareness for anesthetists. Evidence is provided that the concept is an integral part of expertise, and training approaches are discussed.

## MIND TO MIND

### **The Good Doctor: Ode to a Mentor and a Friend** 743

*Richard L. Saupe*

### **Anesthesia** 747

*Davide Cattano*

## CASE REPORTS

### **Inspiratory Stridor after Tracheal Intubation with a MicroCuff® Tracheal Tube in Three Young Infants** 748

*MadhanKumar Sathyamoorthy, Jerrold Lerman, Satyan Lakshminrusimha, and Doron Feldman*

### **Expiratory Limb Ventilation during Unique Failure of the Anesthesia Machine Breathing Circuit** 751

*David M. Seif, and Michael A. Olympio*

### **In Reply**

*Tammy Nol*

## CORRESPONDENCE

### **Sugammadex Dosing in Bariatric Patients** 754

*Denis Schmartz, Philippe Guerci, and Thomas Fuchs-Buder*

### **In Reply**

*Antoni Sabate, and Sandra Llaurodo*

### **Sugammadex Ideal Body Weight Dose Adjusted by Level of Neuromuscular Blockade in Laparoscopic Bariatric Surgery: Erratum** 755

### **Postoperative Supplemental Oxygen and High Intraoperative Inspired Oxygen: Effect and Cause?** 756

*Michael E. Nemerbut, Jukka Räsänen, and John B. Downs*

### **In Reply**

*Matthew C. Gertsch, Natalie Mackintosh, and Harriet W. Hopf*

## Resident Research and Graduate Medical Education Funding

Edward C. Nemergut

757

## Ensuring Future Academic Anesthesiologists: A Matter of Recruiting “The Best” Residents?

Peter G. Pryde

## In Reply

Lee A. Fleisher, Alex S. Evers, Jeanine Wiener-Kronish, and John A. Ulatowski

### REVIEWS OF EDUCATIONAL MATERIALS

761

### ANNOUNCEMENTS

763

### CAREERS & EVENTS

766

## INSTRUCTIONS FOR AUTHORS

The most recently updated version of the Instructions for Authors is available at [www.anesthesiology.org](http://www.anesthesiology.org). Please refer to the Instructions for the preparation of any material for submission to ANESTHESIOLOGY.

Manuscripts submitted for consideration for publication must be submitted in electronic format. The preferred method is via the Journal's Web site (<http://www.anesthesiology.org>). Detailed directions for submissions and the most recent version of the Instructions for Authors can be found on the Web site (<http://www.anesthesiology.org>). Books and educational materials should be sent to Michael J. Avram, Ph.D., Department of Anesthesiology, Northwestern University Feinberg School of Medicine, Ward Memorial Building, Room 13-199, 303 East Chicago Avenue, Chicago, IL 60611-3008. Requests for permission to duplicate materials published in ANESTHESIOLOGY should be submitted in electronic format, to the Permissions Department ([journalpermissions@lww.com](mailto:journalpermissions@lww.com)). Advertising and related correspondence should be addressed to Advertising Manager, ANESTHESIOLOGY, Lippincott Williams & Wilkins, Two Commerce Square, 2001 Market Street, Philadelphia, Pennsylvania 19103 (Web site: <http://www.lww.com/advertisingratecards/>). Publication of an advertisement in ANESTHESIOLOGY does not constitute endorsement by the Society or Lippincott Williams & Wilkins, Inc. of the product or service described therein or of any representations made by the advertiser with respect to the product or service.

**ANESTHESIOLOGY** (ISSN 0003-3022) is published monthly by Lippincott Williams & Wilkins, 16522 Hunters Green Parkway, Hagerstown, MD 21740-2116. Business office: Two Commerce Square, 2001 Market Street, Philadelphia, PA 19103. Periodicals postage paid at Hagerstown, MD, and at additional mailing offices. Copyright © 2013, the American Society of Anesthesiologists, Inc.

**Annual Subscription Rates:** *United States*—\$719 Individual, \$1309 Institution, \$289 In-training. *Rest of World*—\$759 Individual, \$1454 Institution, \$289 In-training. Single copy rate \$126. Subscriptions outside of North America must add \$52 for airfreight delivery. Add state sales tax, where applicable. The GST tax of 7% must be added to all orders shipped to Canada (Lippincott Williams & Wilkins' GST Identification #895524239, Publications Mail Agreement #1119672). Indicate in-training status and name of institution. Institution rates apply to libraries, hospitals, corporations, and partnerships of three or more individuals. Subscription prices outside the United States must be prepaid. Prices subject to change without notice. Subscriptions will begin with currently available issue unless otherwise requested. Visit us online at [www.lww.com](http://www.lww.com).

Individual and in-training subscription rates include print and access to the online version. Online-only subscriptions for individuals (\$245) and persons in training (\$245) are available to nonmembers and may be ordered by downloading a copy of the Online Subscription FAXback Form from the Web site, completing the information requested, and faxing the completed form to 301-223-2400/44 (0) 20 7981 0535. Institutional rates are for print only; online subscriptions are available via Ovid. Institutions can choose to purchase a print and online subscription together for a discounted rate. Institutions that wish to purchase a print subscription, please contact Lippincott Williams & Wilkins, 16522 Hunters Green Parkway, Hagerstown, MD 21740-2116; phone: 1-800-638-3030 (outside the United States 301-223-2300/44 (0) 20 7981 0525); fax: 301-223-2400/44 (0) 20 7981 0535. Institutions that wish to purchase an online subscription or online with print, please contact the Ovid Regional Sales Office near you or visit [www.ovid.com/site/index.jsp](http://www.ovid.com/site/index.jsp) and select Contact and Locations.

### Address for non-member subscription information, orders, or change of address:

Lippincott Williams & Wilkins, 16522 Hunters Green Parkway, Hagerstown, MD 21740-2116; phone: 1-800-638-3030 (outside the United States 301-223-2300/44 (0) 20 7981 0525); fax: 301-223-2400/44 (0) 20 7981 0535; email: [customerservice@lww.com](mailto:customerservice@lww.com). In Japan, contact LWW Japan Ltd., 3-23-14 Hongo, Bunkyo-ku, Tokyo 113, Japan; phone: 81-3-5689-5400; fax: 81-3-5689-5402; email: [bcclaim@lww.co.jp](mailto:bcclaim@lww.co.jp). In Bangladesh, India, Nepal, Pakistan, and Sri Lanka, contact Globe Publications Pvt. Ltd., B-13 3rd Floor, A Block, Shopping Complex, Naraina, Vihar, Ring Road, New Delhi 110028, India; phone: 91-11-25770411; fax: 91-11-25778876; email: [info@globepub.com](mailto:info@globepub.com).

### Address for member subscription information, orders, or change of address:

Members of the American Society of Anesthesiologists receive the print and online journal with their membership. To become a member or provide a change of address, please contact the American Society of Anesthesiologists, 520 N. Northwest Highway, Park Ridge, IL 60068-2573; phone: 847-825-5586; fax: 847-825-1692; email: [membership@ASAhq.org](mailto:membership@ASAhq.org). For all other membership inquiries, contact Lippincott Williams & Wilkins Customer Service Department, P.O. Box 1580, Hagerstown, MD 21741-1580; phone: 1-800-638-3030 (outside the United States 301-223-2300/44 (0) 20 7981 0525); fax: 301-223-2400/44 (0) 20 7981 0535; email: [memberservice@lww.com](mailto:memberservice@lww.com).

**Postmaster:** Send address changes to ANESTHESIOLOGY, P.O. BOX 1550, Hagerstown, MD 21740.

**Advertising:** Please contact Michelle Smith, Senior Account Manager, Advertising, Lippincott Williams & Wilkins, 333 Seventh Avenue, 19th Floor, New York, NY 10001; tel: (646) 674-6537, fax: (646) 607-5479, e-mail: [Michelle.Smith@wolterskluwer.com](mailto:Michelle.Smith@wolterskluwer.com). For classified advertising: Keida Spurlock, Recruitment Advertising Representative, Lippincott Williams & Wilkins, Two Commerce Square, 2001 Market Street, Philadelphia, PA 19103; tel: (215) 521-8501, fax: (215) 689-2453, e-mail: [Keida.Spurlock@wolterskluwer.com](mailto:Keida.Spurlock@wolterskluwer.com).
